# Supplementary material for: Development of a miniaturized protein microarray as a new serological IgG screening test for zoonotic agents and production diseases in pigs
Source: PLoS One. 2019 May 22;14(5):e0217290. doi: 10.1371/journal.pone.0217290 (PMC6530865; doi:10.1371/journal.pone.0217290)
Supplement: S3 Table — Results represent the calculated median values from the microarray. (XLSX) [file pone.0217290.s003.xlsx]

## Sheet: S3
microarray no.	1	2	3	4	5	6	7	8	9	10	11	12	13	14	15	16	17	18	19	20	21	22	23	24	25	26	27	28	29	30	31	32	33	34	35	36	37	38	39	40	41	42	43	44	45	46	47	48	49
ELISA sample no.	6	7	10	13	15	17	18	26	28	29	31	34	38	39	40	45	47	48	49	52	53	54	56	58	59	61	62	63	64	67	68	70	71	72	73	74	77	78	80	82	84	85	86	87	91	92	95	96	97
Salmonella-inhouse-mix_0.1	0.143205	0.116266	0.255362	0.132589	0.189351	0.180645	0.216906	0.272676	0.324469	0.214688	0.298364	0.203081	0.244522	0.201423	0.096394	0.147124	0.203422	0.217458	0.130588	0.0492125	0.212475	0.169936	0.214724	0.193691	0.113099	0.181209	0.249231	0.183146	0.14587	0.274143	0.173188	0.18372	0.212268	0.162233	0.172639	0.191441	0.314574	0.17371	0.29806	0.215689	0.0541595	0.133045	0.080948	0.134421	0.305194	0.070724	0.144786	0.0855095	0.425003
Salmonella-inhouse-mix_0.2	0.244733	0.225084	0.389278	0.249044	0.339125	0.277872	0.312702	0.391653	0.419918	0.317182	0.400736	0.343259	0.378914	0.363132	0.186325	0.241468	0.332397	0.37412	0.221618	0.091264	0.275854	0.305181	0.350202	0.270221	0.189575	0.334387	0.421921	0.281739	0.218719	0.38146	0.289682	0.269288	0.341614	0.30491	0.2983	0.324369	0.421574	0.223618	0.349628	0.281479	0.12038	0.222278	0.160591	0.233839	0.39824	0.148463	0.233253	0.168129	0.502336
Salmonella-inhouse-mix_0.5	0.397845	0.353932	0.487398	0.392737	0.472039	0.417129	0.444198	0.594244	0.59147	0.386927	0.497958	0.449191	0.520982	0.489849	0.299566	0.358061	0.4568	0.446767	0.326239	0.153067	0.38319	0.521422	0.492453	0.367433	0.30541	0.39828	0.530723	0.42213	0.288606	0.517578	0.437414	0.375663	0.472367	0.447395	0.4293	0.490395	0.531323	0.365167	0.484036	0.429059	0.284392	0.332809	0.323627	0.333684	0.465062	0.244304	0.357117	0.268811	0.582649
Salmonella-ELISA-mix_0.75	0.441369	0.398238	0.499753	0.410945	0.52716	0.461608	0.468066	0.647566	0.627962	0.382751	0.496695	0.465025	0.541779	0.498862	0.319873	0.35541	0.470771	0.446806	0.327781	0.17341	0.384029	0.54723	0.512854	0.358766	0.311967	0.379913	0.519316	0.402886	0.291729	0.539644	0.463625	0.409274	0.467001	0.464132	0.437441	0.506415	0.56287	0.374827	0.479262	0.435864	0.285906	0.357623	0.319276	0.316189	0.470131	0.243241	0.358115	0.282301	0.580527
Salmonella-ELISA-mix_0.1	0.033572	0.0314835	0.072919	0.0442575	0.129253	0.056332	0.02794	0.301042	0.186091	0.0604045	0.09536	0.058205	0.080744	0.0542585	0.0252795	0.0332475	0.0268555	0.0259805	0.043833	0.0133635	0.05138	0.111744	0.077951	0.047944	0.034853	0.0443955	0.097599	0.0359775	0.037462	0.177038	0.0382735	0.0622955	0.0471475	0.034501	0.0412355	0.037084	0.0992735	0.0380575	0.102907	0.053961	0.0156495	0.0468555	0.0190005	0.03202	0.0524675	0.032672	0.020812	0.021802	0.0744035
Salmonella-ELISA-mix_0.2	0.06466	0.0697365	0.143189	0.090448	0.216307	0.086083	0.0649095	0.411658	0.375182	0.110439	0.156697	0.124223	0.194288	0.096654	0.0468885	0.0562555	0.0600745	0.054383	0.070324	0.0224005	0.0824515	0.234476	0.14978	0.067096	0.0556345	0.117788	0.169298	0.071859	0.054898	0.228372	0.085042	0.113341	0.071948	0.059728	0.072436	0.075208	0.166106	0.0649885	0.175779	0.112942	0.033875	0.092124	0.049212	0.0673895	0.101706	0.0447505	0.0550115	0.048026	0.132503
Salmonella-ELISA-mix_0.5	0.178549	0.175712	0.258769	0.193779	0.383476	0.178146	0.14699	0.593744	0.520875	0.213027	0.275166	0.231977	0.351975	0.202721	0.117322	0.110186	0.141577	0.115399	0.1675	0.047576	0.181906	0.448413	0.290555	0.13301	0.103316	0.198306	0.321902	0.129618	0.104059	0.290811	0.179318	0.195912	0.166399	0.150262	0.175763	0.186684	0.293957	0.165289	0.290833	0.245285	0.0983525	0.145271	0.129827	0.135732	0.194893	0.107309	0.151529	0.0952905	0.271223
Salmonella-ELISA-mix_0.75	0.211787	0.197781	0.300017	0.233343	0.415822	0.226193	0.182891	0.605104	0.553847	0.230396	0.321562	0.263476	0.365289	0.240098	0.151878	0.125629	0.174411	0.135581	0.200825	0.056926	0.233703	0.494131	0.336084	0.164253	0.141591	0.198662	0.354275	0.159288	0.13437	0.306198	0.209724	0.209039	0.1935	0.186269	0.187626	0.21989	0.33478	0.19481	0.31133	0.273099	0.136447	0.182272	0.183548	0.155952	0.234582	0.124216	0.180611	0.115593	0.300822
Trichinella_1_20	0.0083895	0.01452	0.0128265	0.016383	0.0059875	0.0106165	0.006502	0.0092935	0.0135895	0.0184965	0.0040275	0.016229	0.0342925	0.0282535	0.003724	0.0112595	0.009798	0.0102265	0.0050825	0.0114155	0.009715	0.014782	0.031641	0.005568	0.0115445	0.009279	0.037404	0.006739	0.0155695	0.015265	0.012206	0.0141665	0.0123565	0.015593	0.015323	0.0158645	0.0258005	0.0048015	0.017936	0.0078845	0.010157	0.0105145	0.0077925	0.0142145	0.0153475	0.00911	0.004503	0.01503	0.031135
Trichinella_1_50	0.006801	0.0140675	0.010196	0.004831	0.0050125	0.0126375	0.009168	0.006525	0.006089	0.012366	0.0109025	0.0138845	0.033975	0.01616	0.008583	0.008071	0.012198	0.0217635	0.0075365	0.013527	0.017757	0.0090295	0.0084975	0.008605	0.01256	0.008559	0.027231	0.0035335	0.025304	0.0159085	0.0113535	0.0151355	0.009534	0.008684	0.0089655	0.018012	0.012228	0.006687	0.015449	0.013073	0.004262	0.0119885	0.003917	0.0149085	0.0096655	0.0619525	0.00252	0.0067385	0.023173
T.gondii_0.2	0.050207	0.0455345	0.76818	0.0575765	0.0332585	0.0452275	0.018247	0.0146735	0.021452	0.066605	0.0526045	0.0580735	0.035889	0.025978	0.0056145	0.0422445	0.0234925	0.02166	0.011951	0.565694	0.570043	0.012531	0.020317	0.018743	0.019083	0.019008	0.338353	0.030399	0.528353	0.046228	0.023592	0.0278345	0.0163715	0.0269705	0.034171	0.0241815	0.0863955	0.002142	0.0237085	0.0084665	0.012933	0.172424	0.019141	0.024966	0.0110815	0.024708	0.0085895	0.0120415	0.05952
T.gondii_0.5	0.0586675	0.0398345	0.775281	0.056522	0.028167	0.035046	0.009453	0.017439	0.0531355	0.0535595	0.0524855	0.033966	0.0218475	0.032964	0.0065455	0.036657	0.016712	0.022829	0.018604	0.570168	0.555068	0.0102435	0.025542	0.0183155	0.0130715	0.01962	0.375007	0.014147	0.517235	0.027182	0.0224865	0.0277835	0.0163985	0.0226945	0.0246785	0.030159	0.082538	0.003866	0.0246015	0.0145455	0.0071895	0.164245	0.012029	0.0150585	0.0153125	0.012956	0.0064335	0.0113845	0.149372
M.avium_0.05	0.0243575	0.0207545	0.0067925	0.0223785	0.016162	0.022638	0.010172	0.005378	0.009079	0.0239035	0.013867	0.0230665	0.0278365	0.0251085	0.003226	0.0221575	0.018382	0.0090605	0.0070035	0.0091295	0.0232245	0.0162155	0.021923	0.0108355	0.019461	0.016637	0.068459	0.017948	0.0147495	0.1316	0.0124605	0.023468	0.009931	0.0304395	0.0279735	0.0218885	0.0657315	0.0128795	0.026511	0.013368	0.009555	0.047303	0.0095015	0.025021	0.0122005	0.011337	0.009708	0.0109275	0.0298215
M.avium_0.1	0.023688	0.0256795	0.014994	0.0283445	0.014537	0.0221475	0.0168735	0.0030765	0.017156	0.0237995	0.0178265	0.0257445	0.0335525	0.0256345	0.0043765	0.022131	0.01358	0.009537	0.009212	0.012264	0.0102975	0.0151775	0.017583	0.01301	0.02337	0.0190445	0.0792875	0.0204975	0.011923	0.142551	0.014239	0.028915	0.015547	0.0299255	0.0339195	0.019569	0.0464455	0.0153755	0.0313925	0.0114335	0.0143435	0.0495585	0.012668	0.025046	0.023909	0.031415	0.008138	0.0094285	0.036693
M.avium_0.23	0.033937	0.049971	0.0180525	0.046691	0.023914	0.0362315	0.0190245	0.010285	0.0165435	0.036139	0.0283735	0.030136	0.0396485	0.031243	0.0148205	0.031606	0.028338	0.0207885	0.0175125	0.024577	0.0212535	0.0231675	0.0296165	0.0273755	0.0352265	0.021753	0.107672	0.0431825	0.022087	0.181472	0.024449	0.033619	0.0250195	0.046924	0.0467325	0.031712	0.0847855	0.0159275	0.0388885	0.014362	0.014032	0.083034	0.0176435	0.0310815	0.027895	0.0170195	0.015361	0.0107575	0.021199
M.hyopneumoniae_1_10	0.416477	0.47475	0.242046	0.330974	0.725365	0.770399	0.610604	0.553454	0.077243	0.530659	0.315298	0.405156	0.13286	0.25701	0.265661	0.255198	0.69771	0.073127	0.271029	0.403084	0.297503	0.56147	0.784633	0.019817	0.328529	0.080154	0.549878	0.3413	0.034133	0.596334	0.66523	0.590793	0.744366	0.671824	0.656918	0.793845	0.452614	0.072864	0.0313175	0.248273	0.687943	0.723813	0.156493	0.77208	0.633729	0.082138	0.287604	0.77113	0.794015
M.hyopneumoniae_1_20	0.219961	0.201151	0.233355	0.190561	0.650525	0.752524	0.515288	0.560576	0.102338	0.458311	0.550515	0.353757	0.196752	0.139823	0.093958	0.11887	0.432063	0.036302	0.395796	0.197244	0.42316	0.322471	0.60984	0.0383095	0.111342	0.0243145	0.274638	0.120084	0.058243	0.391894	0.696342	0.524575	0.527003	0.328222	0.425075	0.578431	0.240117	0.229475	0.190891	0.76381	0.371928	0.491443	0.042372	0.501004	0.72344	0.0329385	0.0884435	0.569431	0.653182
M.hyopneumoniae_1_50	0.0396175	0.029849	0.0448945	0.045193	0.124178	0.163698	0.0503215	INVALID	0.047788	0.096354	0.080651	0.0159075	0.028345	0.0475105	0.0175455	0.0296875	INVALID	0.01784	0.067847	0.0210165	0.0355635	0.111762	INVALID	0.008516	0.0326685	0.008043	0.09498	0.0338075	0.023383	0.028001	0.653867	0.0482035	0.115139	0.046402	0.072569	0.132395	0.0289195	0.0075725	0.0211395	0.417945	0.0601605	0.058628	0.0147045	0.0489645	0.261608	0.022157	0.0191395	0.0640745	0.28793
Y.enterocolitica_YOP_O:3_0.1	0.019449	0.0346005	0.016318	0.339451	0.140353	0.144006	0.264184	0.368716	0.277592	0.0922835	0.178735	0.0921355	0.100116	0.087963	0.246954	0.052849	0.05941	0.103697	0.143135	0.0450805	0.059296	0.104517	0.254953	0.038361	0.0716375	0.004307	0.023243	0.0160715	0.045775	0.050803	0.047549	0.0452235	0.0364085	0.182128	0.040755	0.041694	0.44601	0.0516495	0.260551	0.219809	0.117365	0.075215	0.030487	0.253573	0.28497	0.0762645	0.0813585	0.143668	0.429968
Y.enterocolitica_YOP_O:3_0.2	0.0294095	0.032728	0.0104315	0.557689	0.405171	0.328514	0.520251	0.586828	0.49007	0.156705	0.389311	0.274216	0.193719	0.248065	0.531942	0.180168	0.196417	0.346327	0.432637	0.0363975	0.170473	0.260317	0.469992	0.026176	0.048638	0.0131905	0.0199315	0.0133175	0.033941	0.0892165	0.164954	0.093247	0.0305555	0.476855	0.110566	0.0377395	0.634501	0.136531	0.509171	0.462973	0.292289	0.280486	0.061923	0.481382	0.504134	0.199116	0.280798	0.32102	0.665458
Y.enterocolitica_YOP_O:3_0.5	0.0821225	0.042179	0.0218655	0.715604	0.704514	0.653545	0.728872	0.745262	0.720999	0.528088	0.650702	0.617598	0.539206	0.601131	0.716789	0.491804	0.513247	0.655033	0.700273	0.03734	0.565821	0.50458	0.701616	0.0662165	0.062757	0.031971	0.036397	0.0184815	0.0398245	0.376692	0.532249	0.422171	0.049952	0.687657	0.386379	0.0791085	0.766177	0.513301	0.739089	0.728039	0.609201	0.597683	0.297648	0.701476	0.744838	0.589778	0.55552	0.588735	0.768045
Y.enterocolitica_mix_0.1	0.016958	0.0133045	0.008894	0.0136895	0.0115005	0.018718	0.0090135	0.0073895	0.0127135	0.019346	0.010525	0.0211755	0.041909	0.0260255	0.0040325	0.017422	0.007521	0.005346	0.0048825	0.0145655	0.0062235	0.013415	0.012553	0.0103055	0.023253	0.0154865	0.076927	0.0149825	0.012138	0.140923	0.00891	0.0279065	0.0099685	0.0212225	0.0224405	0.019486	0.035151	0.0077195	0.021178	0.0092335	0.012289	0.0456865	0.0090535	0.0385405	0.038888	0.019793	0.0066795	0.006149	0.0259025
Y.enterocolitica_mix_0.2	0.02617	0.012137	0.0146005	0.13501	0.033208	0.0573925	0.0647215	0.058398	0.025356	0.0285065	0.0292955	0.04906	0.0371845	0.039875	0.0333705	0.026445	0.04645	0.030147	0.0396935	0.0077785	0.015769	0.0243795	0.0376165	0.014197	0.015813	0.0231435	0.067266	0.02046	0.010651	0.171172	0.025927	0.0365125	0.0107545	0.100055	0.035611	0.0129215	0.141654	0.0152555	0.107178	0.062354	0.036015	0.074403	0.03174	0.141964	0.113572	0.047405	0.028448	0.024208	0.0899685
Y.enterocolitica_mix_0.3	0.022704	0.011117	0.0096575	0.16623	0.046051	0.05234	0.084581	0.067896	0.032502	0.026806	0.034122	0.0575075	0.0368075	0.0389635	0.0369675	0.0267735	0.033633	0.025545	0.050239	0.0057435	0.021872	0.029069	0.051662	0.010584	0.0152815	0.015719	0.07793	0.01512	0.0116115	0.189155	0.0313665	0.040233	0.0120215	0.094072	0.0316245	0.017967	0.192615	0.0210385	0.167154	0.086579	0.0656825	0.098556	0.035261	0.175027	0.165288	0.068892	0.0325045	0.0352005	0.162615
Hepatitis-E-virus_0.25	0.073707	0.075954	0.0318605	0.115555	0.0560145	0.098993	0.0250305	0.0219315	0.0575575	0.110104	0.0378705	0.09045	0.052068	0.0699975	0.0378675	0.0801815	0.055761	0.036229	0.0223565	0.03596	0.046801	0.028427	0.0484615	0.034635	0.0456425	0.037382	0.147633	0.032851	0.053906	0.142385	0.0490135	0.036843	0.0288535	0.042189	0.049935	0.0386405	0.149224	0.007275	0.037457	0.0224325	0.0132095	0.25824	0.0281175	0.0357795	0.026255	0.0188295	0.0201135	0.02228	0.1708
Hepatitis-E-virus_0.5	0.078068	0.113156	0.021158	0.136081	0.052892	0.138088	0.0253435	0.0154905	0.06689	0.126857	0.0405605	0.084487	0.0600775	0.091077	0.0072475	0.098789	0.042653	0.04546	0.031087	0.027456	0.0394485	0.025006	0.0534545	0.02645	0.044812	0.0329765	0.141758	0.022562	0.031143	0.0837405	0.05258	0.03537	0.0314575	0.0493105	0.037305	0.0355795	0.157713	0.010479	0.039813	0.0246015	0.013625	0.238426	0.025374	0.0377935	0.0313175	0.020818	0.024738	0.0251365	0.177459
Hepatitis-E-virus_0.75	0.0846525	0.125548	0.0229225	0.136496	0.0491395	0.133507	0.025884	0.0150725	0.0630875	0.123005	0.046851	0.0577165	0.0568065	0.059724	0.0178965	0.105166	0.064843	0.0419525	0.0353005	0.0306125	0.0434165	0.0240065	0.04778	0.0247375	0.031352	0.025562	0.138703	0.0303115	0.0321365	0.061382	0.048971	0.0303575	0.026519	0.036363	0.030722	0.0433085	0.15448	0.0511685	0.0315775	0.0243905	0.0155915	0.233093	0.035955	0.026612	0.0303985	0.014763	0.021508	0.0230955	0.152415
A.pleuropneumoniae_1_10	0.025915	0.031816	0.03581	0.016127	0.027345	0.030301	0.02181	0.018095	0.01592	0.020857	0.035912	0.025432	0.026223	0.038362	0.028531	0.030009	0.019544	0.019657	0.015792	0.024963	0.026347	0.028418	0.027752	0.010009	0.023017	0.007517	0.031112	0.068341	0.018208	0.034364	0.027897	0.036635	0.026396	0.041505	0.043539	0.030009	0.046582	0.011394	0.024469	0.018412	0.0544895	0.024786	0.012433	0.020758	0.037385	0.027787	0.007779	0.015372	0.05107
A.pleuropneumoniae_1_20	0.067647	0.0911285	0.0860475	0.077058	0.051879	0.0599325	0.048698	0.0408985	0.0406735	0.0637785	0.056955	0.061672	0.0709095	0.094174	0.046713	0.0514395	0.040379	0.0240355	0.029223	0.033941	0.0621445	0.0483785	0.0516	0.0361085	0.038075	0.030557	0.102594	0.0275585	0.047816	0.0432035	0.053213	0.0568775	0.051366	0.086753	0.073623	0.064108	0.113553	0.026312	0.036482	0.0267005	0.035749	0.170606	0.028419	0.034321	0.0543695	0.015849	0.018169	0.033334	0.13205
A.pleuropneumoniae_1_5	0.191493	0.220172	0.26615	0.182509	0.167814	0.168727	0.173338	0.156616	0.135033	0.200294	0.207947	0.197736	0.199813	0.243843	0.203225	0.216647	0.189033	0.159095	0.128574	0.123028	0.277568	0.21888	0.160859	0.11829	0.133807	0.112639	0.167252	0.138192	0.149216	0.15204	0.150539	0.136082	0.23965	0.282687	0.263622	0.269888	0.17852	0.107479	0.130388	0.130217	0.140921	0.171789	0.059763	0.0862905	0.215049	0.0593955	0.0605065	0.130704	0.339902
Influenza-A-virus_0.05	0.018259	0.0131225	0.008422	0.021888	0.00938	0.0198265	0.0062695	0.006583	0.010064	0.012611	0.0068225	0.01985	0.0290215	0.0238875	0.0054245	0.0268285	0.0133295	0.0063405	0.008217	0.0126015	0.007109	0.019316	0.0324415	0.0118075	0.019347	0.0162615	0.065546	0.0138705	0.013929	0.0983715	0.018543	0.024657	0.0125245	0.02102	0.018382	0.0179695	0.039466	0.0148985	0.026307	0.01181	0.00615	0.030469	0.010296	0.01819	0.012207	0.003965	0.011405	0.0140515	0.035628
Influenza-A-virus_0.1	0.0161995	0.0112865	0.007366	0.0097755	0.0060805	0.019517	0.005738	0.0053095	0.007728	0.016738	0.0070015	0.022004	0.027372	0.021096	0.0034825	0.008671	0.006184	0.0055715	0.00528	0.0021025	0.0070675	0.012696	0.015314	0.007145	0.009254	0.01202	0.058653	0.01148	0.0028425	0.140079	0.010604	0.025846	0.0198525	0.0268265	0.015853	0.015162	0.018818	0.0055095	0.019969	0.011247	0.0070735	0.027971	0.003619	0.019767	0.0084255	0.009247	0.005525	0.0144965	0.0195435
Influenza-A-virus_0.2	0.019889	0.013774	0.009239	0.012528	0.0059735	0.036072	0.007675	0.0078805	0.0100615	0.0172885	0.0092475	0.020683	0.040831	0.010219	0.008459	0.011507	0.0039505	0.003746	0.004947	0.007077	0.007135	0.0077595	0.0067945	0.009018	0.0126395	0.0128255	0.0522415	0.0080565	0.0089525	0.044069	0.0083425	0.014535	0.0210285	0.023076	0.016326	0.0088715	0.0250035	0.025436	0.0231795	0.0108525	0.0162105	0.018312	0.0049275	0.020631	0.01221	0.0122945	0.00363	0.006038	0.025432
PRRSV-inhouse-mix_0.1	0.0238405	0.043303	0.015795	0.04319	0.018412	0.02401	0.009124	0.005071	0.015813	0.0401265	0.0141465	0.0361675	0.0417445	0.0334665	0.0031035	0.0314635	0.014941	0.009373	0.0102825	0.0111305	0.0101195	0.0082865	0.0223895	0.0152555	0.017401	0.0167325	0.0466015	0.0162825	0.010511	0.018299	0.0235495	0.0350775	0.02831	0.024301	0.0986765	0.0196905	0.053142	0.0075295	0.026133	0.005195	0.0121615	0.0917915	0.0133735	0.017902	0.015387	0.0189085	0.0075655	0.029616	0.0812445
PRRSV-inhouse-mix_0.2	0.0159525	0.174898	0.022546	0.0180995	0.0110355	0.0121525	0.0074115	0.0059715	0.011348	0.002619	0.01865	0.016053	0.031969	0.01963	0.003373	0.0176175	0.022035	0.00829	0.025077	0.0108395	0.0105415	0.007957	0.103524	0.028451	0.0083475	0.0064555	0.0343745	0.007582	0.0116485	0.018405	0.0274135	0.0349905	0.021679	0.024118	0.09938	0.0209905	0.158286	0.010728	0.0213165	0.018063	0.012144	0.0502895	0.011789	0.016656	0.020386	0.060085	-0.001263	0.057552	0.037084
PRRSV-inhouse-mix_0.5	0.04375	0.01806	0.276612	0.026616	0.0251205	0.0848775	0.005696	0.0683795	0.163602	0.0069465	0.107144	0.070073	0.078086	0.142429	0.0737705	0.04458	0.0912005	0.005878	0.367464	0.0913455	0.031403	0.063368	0.290887	0.456549	0.197856	0.008578	0.0834685	0.0237885	0.211562	0.050408	0.084985	0.634939	0.441731	0.044679	0.132942	0.037904	0.0244815	0.0209195	0.0667985	0.047244	0.03233	0.0350355	0.033001	0.0175725	0.059034	0.100201	0.018714	0.211206	0.050435
PRRSV-inhouse-mix_0.75	0.360831	0.452634	0.30408	0.135301	0.088129	0.10631	0.109889	0.146735	0.229886	0.118114	0.158629	0.215618	0.303291	0.229258	0.081383	0.073827	0.195525	0.249356	0.355057	0.064483	0.187781	0.193245	0.486494	0.534955	0.315094	0.11752	0.323325	0.132876	0.363717	0.696083	0.697609	0.672969	0.614585	0.075404	0.665231	0.577101	0.189315	0.0802125	0.19552	0.147302	0.132224	0.209844	0.106902	0.0462495	0.142436	0.0796	0.0754585	0.742397	0.515368
purified-pig-IgG_0.01	0.508011	0.48504	0.510005	0.512339	0.47997	0.489299	0.491319	0.488882	0.457699	0.544442	0.492712	0.477787	0.508544	0.253178	INVALID	0.12716	0.419575	0.412825	0.480994	0.37851	0.517698	0.448654	0.428942	0.521413	0.43247	0.458387	0.449716	0.458161	0.49176	0.495075	0.45799	0.411821	0.450333	0.246953	0.440782	0.423452	0.545415	0.508962	0.518199	0.52089	0.420908	0.460342	0.46348	0.454708	0.568355	0.37793	0.381721	0.369055	0.280194
purified-pig-IgG_0.05	0.72973	0.728326	0.742644	0.71941	0.725696	0.718732	0.717444	0.734096	0.718775	0.737576	0.73069	0.730036	0.742189	0.735812	0.686751	0.688467	0.700592	0.687083	0.709782	0.68147	0.747302	0.69401	0.69808	0.744412	0.704388	0.707703	0.703318	0.693854	0.745538	0.72178	0.72345	0.707121	0.707152	0.706433	0.680917	0.658025	0.741069	0.752244	0.747583	0.749909	0.675423	0.700679	0.683093	0.677383	0.768004	0.646802	0.632838	0.625284	0.749702
purified-pig-IgG_0.1	0.761494	0.75693	0.77827	0.760397	0.768314	0.770555	0.772072	0.774251	0.769672	0.78479	0.781507	0.77581	0.775143	0.758402	0.724549	0.731893	0.730235	0.7281	0.767836	0.728619	0.78193	0.724157	0.734076	0.778802	0.730182	0.739309	0.739431	0.758789	0.782148	0.76473	0.765211	0.76288	0.725627	0.724511	0.730193	0.714044	0.783591	0.785798	0.782424	0.783007	0.736211	0.725894	0.686904	0.736564	0.785659	0.719152	0.709942	0.72699	0.788847
purified-pig-IgG_0.2	0.794061	0.795363	0.798547	0.791028	0.799617	0.792897	0.794909	0.794721	0.792839	0.801397	0.797392	0.798885	0.793471	0.791034	0.772525	0.776293	0.77869	0.782309	0.791467	0.629357	0.799633	0.657637	0.71932	0.803118	0.787751	0.797568	0.794371	0.799645	0.802204	0.792699	0.792784	0.783036	0.775994	0.771084	0.768979	0.758779	0.808013	0.800006	0.796731	0.795964	0.776238	0.781129	0.781833	0.777831	0.805126	0.765766	0.756225	0.765278	0.793292
purified-pig-IgG_0.3	0.803628	0.800445	0.801551	0.797923	0.800547	0.797914	0.801825	0.798269	0.791884	0.809037	0.796609	0.800566	0.795438	0.80022	0.792845	0.796288	0.800068	0.796125	0.793834	0.799113	0.798354	0.797483	0.795398	0.801724	0.78793	0.799314	0.79894	0.800137	0.803126	0.791197	0.792589	0.789204	0.79188	0.792556	0.792082	0.779905	0.812254	0.797921	0.795446	0.796482	0.798477	0.799283	0.800826	0.796301	0.809032	0.790545	0.778767	0.778889	0.800813
[truncated: 73 more columns]
